# Supplementary material for: The Antimicrobial Potency of Mesoporous Silica Nanoparticles Loaded with Melissa officinalis Extract
Source: MDPI journal article supplement (doi:10.3390/pharmaceutics16040525), 2024-04-10
Supplement: s1 [file s1]

# The antimicrobial potency of mesoporous silica nanoparticles loaded with *Melissa officinalis* extract

Gabriela Petrișor<sup>1,2,3,4</sup>, Ludmila Motelica<sup>1,2,3,4</sup>, Roxana Doina Trușcă<sup>1,2,3</sup>, Andreea-Luiza Mîrț<sup>1,2,3,5</sup>, Gabriel Vasilievici<sup>5</sup>, Justinian-Andrei Tomescu<sup>6</sup>, Cristina Manea<sup>6</sup>, Andreea Ștefania Dumbravă<sup>7</sup>, Viorica Maria Corbu<sup>7</sup>, Irina Gheorghe-Barbu<sup>7</sup>, Denisa Ficai<sup>2,3,4,8</sup>, Ovidiu-Cristian Oprea<sup>2,3,4,8\*</sup>, Bogdan-Ștefan Vasile<sup>1,2,3,4</sup>, Anton Ficai<sup>1,2,3,4</sup> and Anca Daniela Raiciu<sup>6,9</sup>

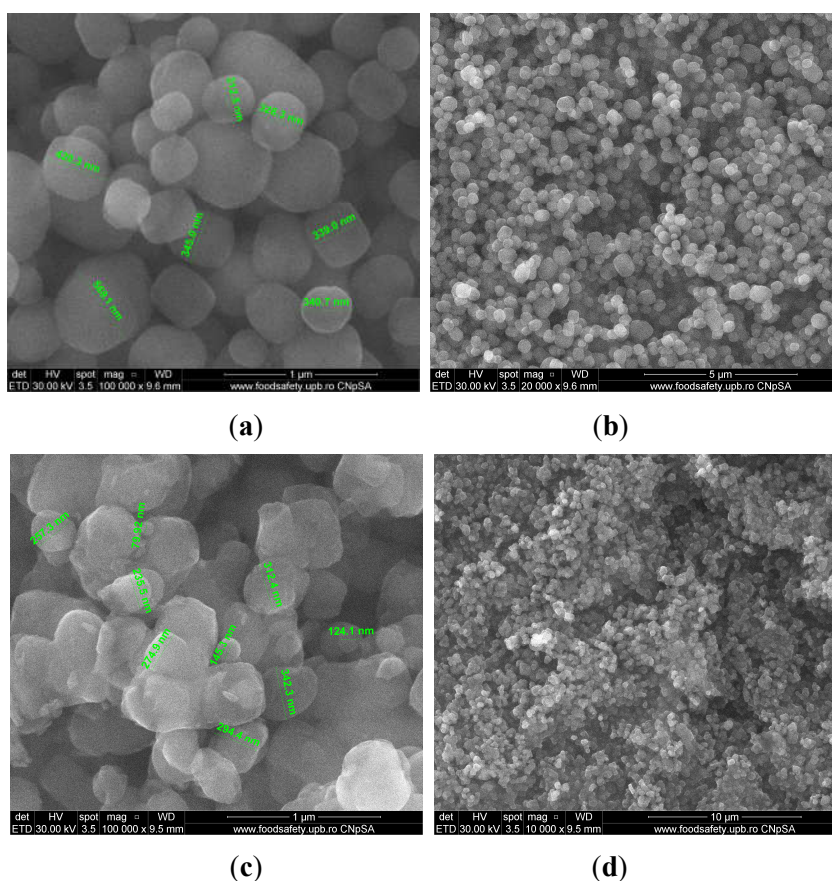

Figure S1. The SEM micrographs of MCM-41 (a,b); MCM-48 (c,d).

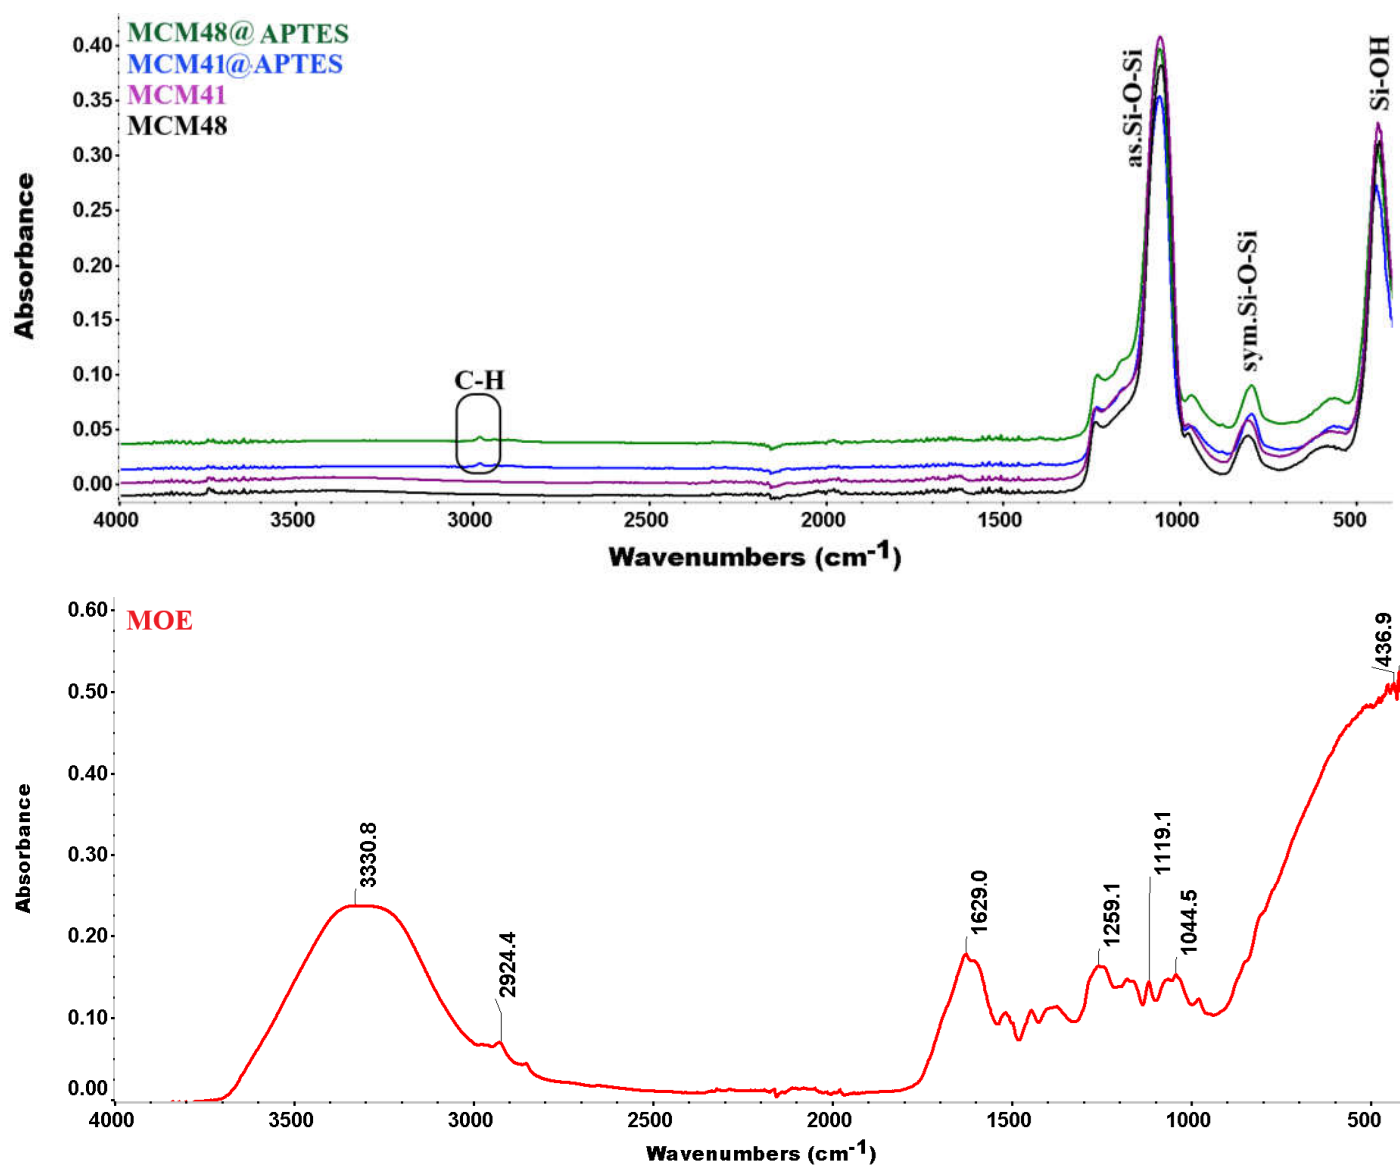

**Figure S2.** The FTIR spectra for the MCM-41, MCM-48, MCM-41@APTES, MCM-48@APTES particles and *Melissa officinalis* extract (MOE).

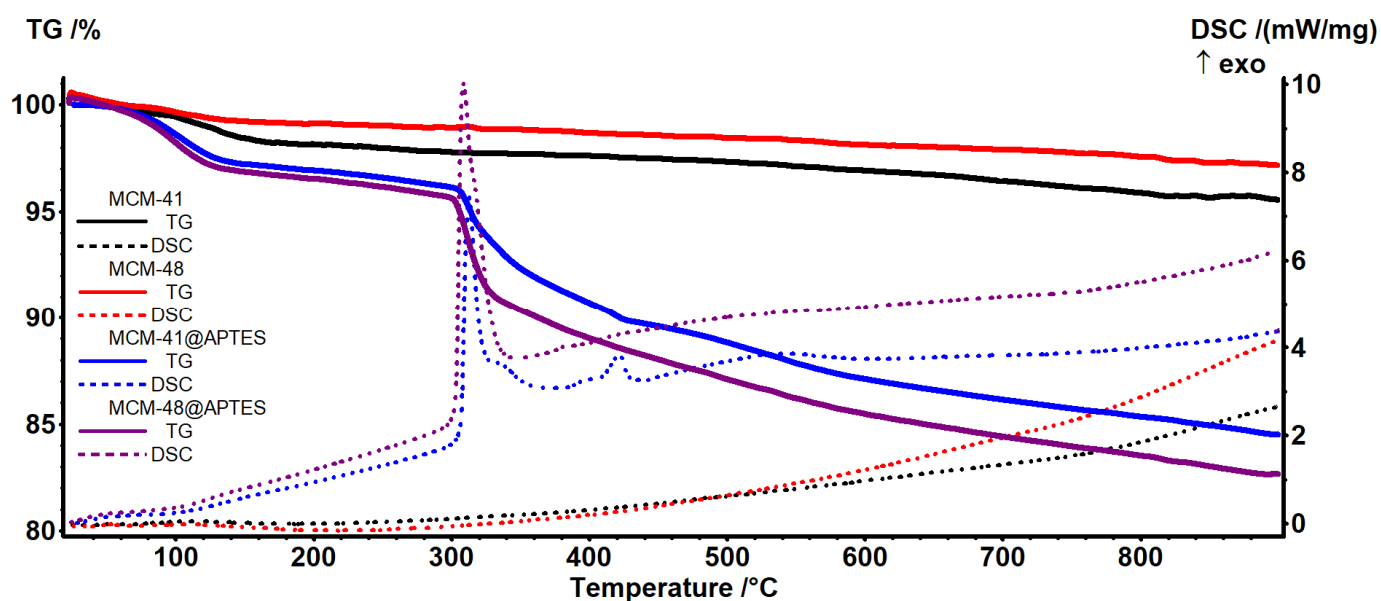

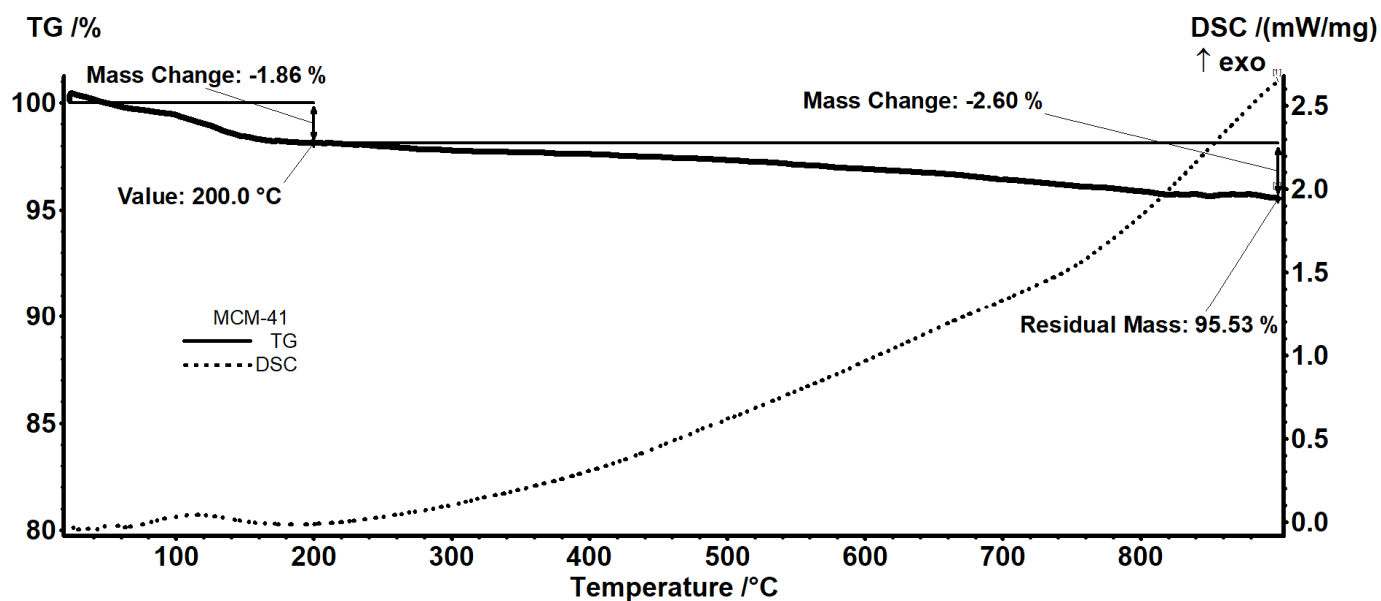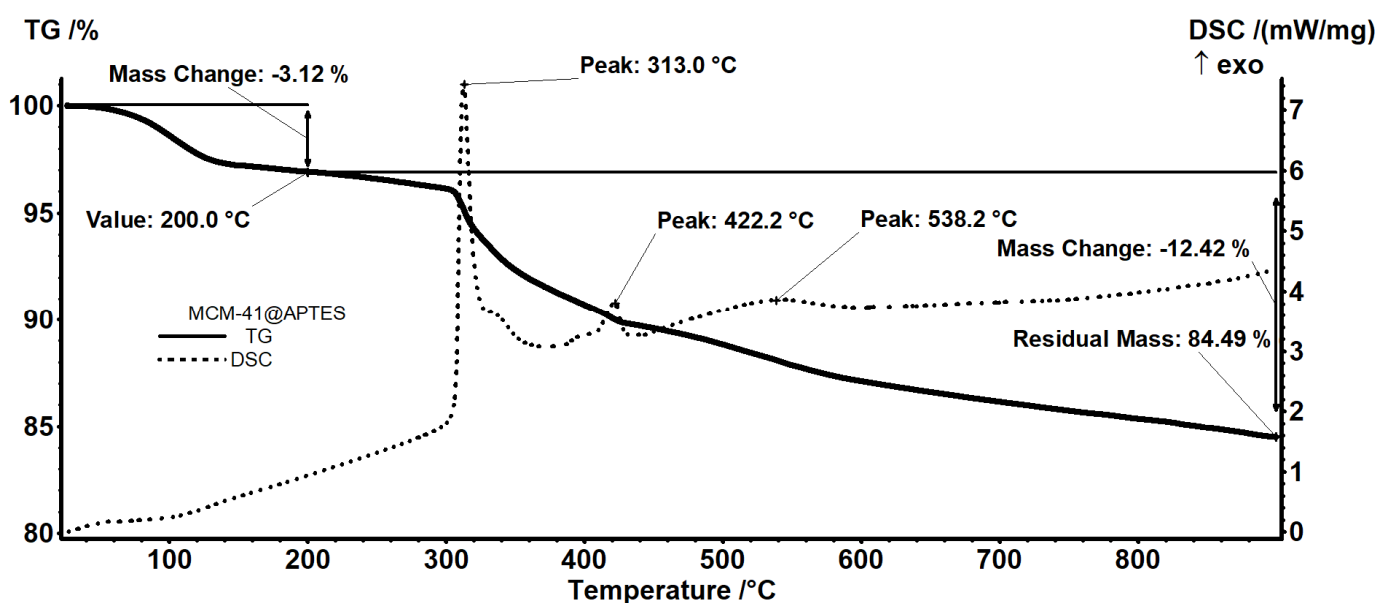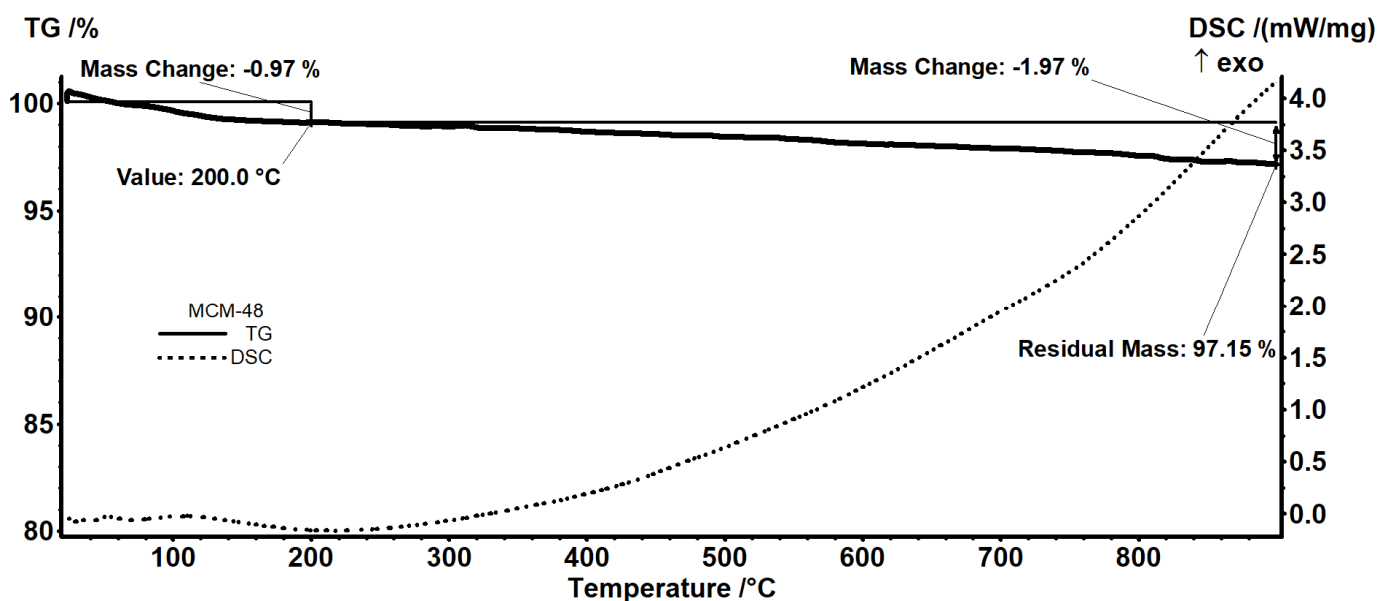

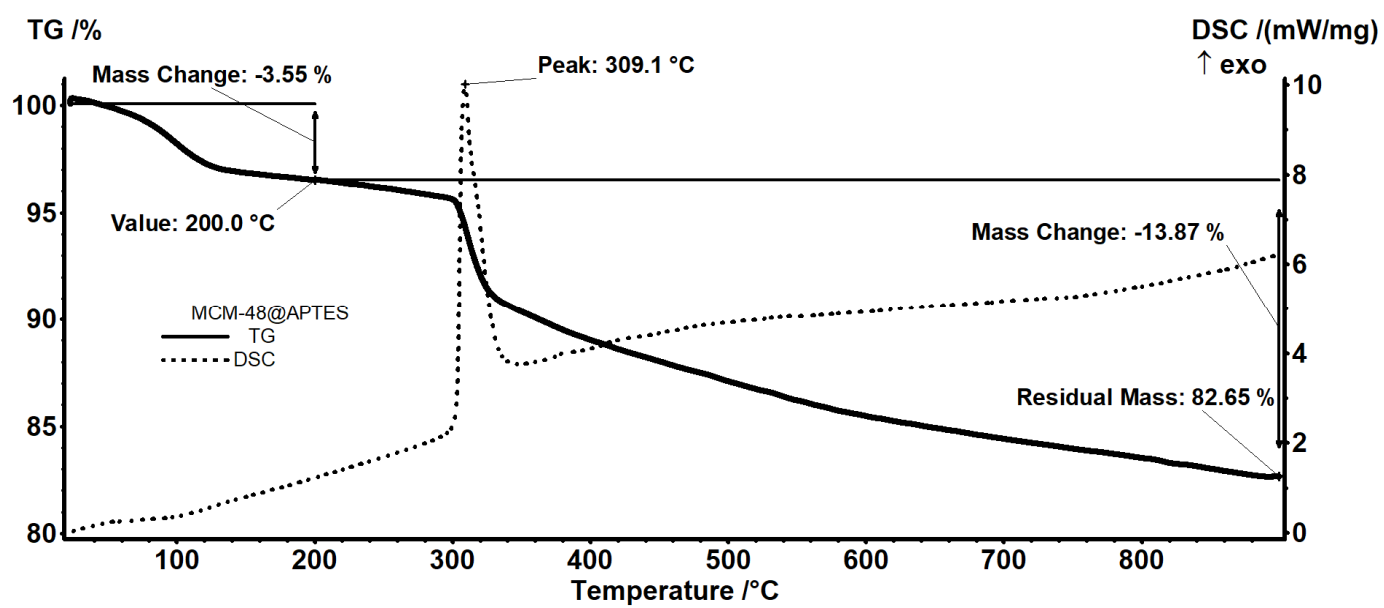

Figure S3. The TG–DSC curves for the MCM-41, MCM-48, MCM-41@APTES and MCM-48@APTES.
